# Supplementary material for: Contrasting Properties of Gene-Specific Regulatory, Coding, and Copy Number Mutations in Saccharomyces cerevisiae: Frequency, Effects, and Dominance
Source: PubMed Central journal article supplement (PMC3276545; doi:10.1371/journal.pgen.1002497), 2012-02-09
Supplement: pgen.1002497.s003.pdf [file pgen.1002497.s003.pdf]

**Table S1. Percentage of each subpopulation more extreme than sorting threshold**

| <i>run ID</i> | <b>Low fluorescence</b> |            | <b>High Fluorescence</b> |            |
|---------------|-------------------------|------------|--------------------------|------------|
|               | <i>Control</i>          | <i>EMS</i> | <i>Control</i>           | <i>EMS</i> |
| 1             | 0.47                    | 0.79       | 0.99                     | 1.49       |
| 2             | 0.99                    | 1.39       | 0.56                     | 0.96       |
| 3             | 1.00                    | 1.38       | 0.56                     | 0.91       |
| 4             | 1.05                    | 1.40       | 0.51                     | 0.89       |
| 6             | 0.86                    | 1.24       | 0.55                     | 0.88       |
| 7             | 0.89                    | 1.35       | 0.57                     | 0.95       |
| 8             | 0.76                    | 1.17       | 0.67                     | 1.09       |
| 9             | 0.68                    | 1.10       | 0.68                     | 1.11       |
| 10            | 0.72                    | 1.14       | 0.67                     | 1.12       |
| Mean          | 0.82                    | 1.22       | 0.64                     | 1.04       |
