# Supplementary material for: Contrasting Properties of Gene-Specific Regulatory, Coding, and Copy Number Mutations in Saccharomyces cerevisiae: Frequency, Effects, and Dominance
Source: PubMed Central journal article supplement (PMC3276545; doi:10.1371/journal.pgen.1002497), 2012-02-09
Supplement: pgen.1002497.s006.pdf [file pgen.1002497.s006.pdf]

**Table S4: Estimation of  $P_{TDH3}$ -YFP fluorescence mutation rate from validated mutants**

**All validated mutants**

| Phenotype   | cell fraction <sup>1</sup> | relative viability <sup>2</sup> | c.f.u. fraction <sup>3</sup> | mutants <sup>4</sup> | screened <sup>5</sup> | frequency <sup>6</sup>                                      | mutant frequency <sup>7</sup> |
|-------------|----------------------------|---------------------------------|------------------------------|----------------------|-----------------------|-------------------------------------------------------------|-------------------------------|
| High YFP    | 0.010                      | 0.784                           | 0.008                        | 162                  | 503                   | 0.322                                                       | 0.0026                        |
| Typical YFP | 0.977                      | 1.000                           | 0.977                        |                      |                       |                                                             |                               |
| Low YFP     | 0.012                      | 0.843                           | 0.010                        | 69                   | 561                   | 0.119                                                       | 0.0012                        |
| Total       | 1.000                      |                                 | 0.996                        | 231                  | 1064                  |                                                             | 0.0039                        |
|             |                            |                                 |                              |                      |                       | <sup>8</sup> Inflation factor due to EMS                    | 5797                          |
|             |                            |                                 |                              |                      |                       | <sup>9</sup> Spontaneous mutation rate (x10 <sup>-7</sup> ) | 6.6476                        |

**Validated mutants, excluding known CNVs**

| Phenotype   | cell fraction <sup>1</sup> | relative viability <sup>2</sup> | c.f.u. fraction <sup>3</sup> | mutants <sup>4</sup> | screened <sup>5</sup> | frequency <sup>6</sup>                                      | mutant frequency <sup>7</sup> |
|-------------|----------------------------|---------------------------------|------------------------------|----------------------|-----------------------|-------------------------------------------------------------|-------------------------------|
| High YFP    | 0.010                      | 0.784                           | 0.008                        | 141                  | 503                   | 0.280                                                       | 0.0023                        |
| Typical YFP | 0.977                      | 1.000                           | 0.977                        |                      |                       |                                                             |                               |
| Low YFP     | 0.012                      | 0.843                           | 0.010                        | 68                   | 561                   | 0.119                                                       | 0.0012                        |
| Total       | 1.000                      |                                 | 0.996                        | 209                  | 1064                  |                                                             | 0.0035                        |
|             |                            |                                 |                              |                      |                       | <sup>8</sup> Inflation factor due to EMS                    | 5797                          |
|             |                            |                                 |                              |                      |                       | <sup>9</sup> Spontaneous mutation rate (x10 <sup>-7</sup> ) | 6.0605                        |

<sup>1</sup> proportion of all FACS events ("cells") with this phenotype

<sup>2</sup> proportion of c.f.u. with this phenotype relative to the proportion of c.f.u. in the wild-type YFP expression class

<sup>3</sup> proportion of all c.f.u. with this phenotype

<sup>4</sup> number of c.f.u. with significant changes in YFP fluorescence

<sup>5</sup> number of c.f.u. subjected to secondary screening

<sup>6</sup> proportion of c.f.u. screened that are fluorescence mutants

<sup>7</sup> frequency of fluorescence mutants among all c.f.u. in the population used for sorting

<sup>8</sup> measured by comparing the observed frequency of canavanine resistance mutants to a published estimate of the spontaneous canavanine resistance mutation rate.

<sup>9</sup> spontaneous mutation rate of fluorescence changes suggested by observed EMS-induced mutant frequency; measured per haploid genome, per generation.
